# Supplementary material for: Genomic expression differences between cutaneous cells from red hair color individuals and black hair color individuals based on bioinformatic analysis
Source: PubMed Central journal article supplement (PMC5355288; doi:10.18632/oncotarget.14140), 2016-12-24
Supplement: oncotarget-08-11589-s001.pdf [file oncotarget-08-11589-s001.pdf]

## Genomic expression differences between cutaneous cells from red hair color individuals and black hair color individuals based on bioinformatic analysis

### SUPPLEMENTARY TABLES

#### Supplementary Table 1: Attributes of nodes from networks of up-regulated genes (N=557)

See Supplementary File 1

#### Supplementary Table 2: Attributes of nodes from networks of down-regulated genes (N=450)

See Supplementary File 1

**Supplementary Table 3: First connections of the *ATG4C* gene:** Table shows the first connections of the *ATG4C* gene within the network of up-regulated transcripts. Name gene and KEGG pathway in which gene is associated with, is indicated. NA= Not associated KEGG pathway.

See Supplementary File 1

**Supplementary Table 4: First connections of the *ATG10*:** Table shows the first connections of the *ATG10* gene within the network of up-regulated transcripts. Name gene and KEGG pathway in which gene is associated with, is indicated. NA= Not associated KEGG pathway.

See Supplementary File 1

**Supplementary Table 5: First connection of *BRC1*:** Table shows the first connections of *BRC1* gene within the network of up-regulated transcripts. Name gene and KEGG pathway in which gene is associated with, is indicated. NA= Not associated KEGG pathway.

See Supplementary File 1

**Supplementary Table 6: First connections of the *BUB1B***

| GEN     | KEGG                                                                                                                                                                                                                                                                                                 |
|---------|------------------------------------------------------------------------------------------------------------------------------------------------------------------------------------------------------------------------------------------------------------------------------------------------------|
| ANAPC16 | NA                                                                                                                                                                                                                                                                                                   |
| ANAPC4  | HTLV-I infection (hsa05166), Progesterone-mediated oocyte maturation (hsa04914), Oocyte meiosis (hsa04114), Ubiquitin mediated proteolysis (hsa04120), Cell cycle (hsa04110)                                                                                                                         |
| AP2B1   | Endocytosis (hsa04144), Synaptic vesicle cycle (hsa04721), Endocrine and other factor-regulated calcium reabsorption (hsa04961), Huntington's disease (hsa05016)                                                                                                                                     |
| BUB1    | Progesterone-mediated oocyte maturation (hsa04914), Cell cycle (hsa04110), Oocyte meiosis (hsa04114)                                                                                                                                                                                                 |
| BUB3    | Cell cycle (hsa04110), HTLV-I infection (hsa05166)                                                                                                                                                                                                                                                   |
| CDC20   | HTLV-I infection (hsa05166), Pyrimidine metabolism (hsa00240), Metabolic pathways (hsa01100), Oocyte meiosis (hsa04114), Viral carcinogenesis (Viral carcinogenesis (hsa05203)), Cell cycle (hsa04110), Ubiquitin mediated proteolysis (hsa04120)                                                    |
| CDC27   | Oocyte meiosis (hsa04114), Ubiquitin mediated proteolysis (hsa04120), Cell cycle (hsa04110), Ubiquinone and other terpenoid-quinone biosynthesis (hsa00130), HTLV-I infection (hsa05166), Progesterone-mediated oocyte maturation (hsa04914)                                                         |
| CENPE   | Pathways in cancer (hsa05200), HTLV-I infection (hsa05166), Signaling pathways regulating pluripotency of stem cells (hsa04550), Hippo signaling pathway (hsa04390), Wnt signaling pathway (hsa04310), Basal cell carcinoma (hsa05217), Melanogenesis (hsa04916), Notch signaling pathway (hsa04330) |
| MAD2L1  | HTLV-I infection (hsa05166), Progesterone-mediated oocyte maturation (hsa04914), Cell cycle (hsa04110), Oocyte meiosis (hsa04114)                                                                                                                                                                    |
| MIS12   | NA                                                                                                                                                                                                                                                                                                   |
| PARP1   | NF-kappa B signaling pathway (hsa04064), Purine metabolism (hsa00230), Metabolic pathways (hsa01100), Base excision repair (hsa03410)                                                                                                                                                                |
| UBE2C   | Ubiquitin mediated proteolysis (hsa04120)                                                                                                                                                                                                                                                            |

Table shows the first connections of the *BUB1B* gene within the network of up-regulated transcripts. Name gene and KEGG pathway in which gene is associated with, is indicated. NA= Not associated KEGG pathway.

**Supplementary Table 7: First connection of *CDK1*.** Table shows the first connections of the *CDK1* gene within the network of up-regulated transcripts. Name gene and KEGG pathway in which gene is associated with, is indicated. NA= Not associated KEGG pathway.

See Supplementary File 1

**Supplementary Table 8: First connections of the *GBAS* gene.** Table shows the first connections of the *GBAS* gene within the network of up-regulated transcripts. Name gene and KEGG pathway in which gene is associated with, is indicated. NA= Not associated.

See Supplementary File 1

**Supplementary Table 9: First connections of the *ICT1* gene.** Table shows the first connections of the *ICT1* gene within the network of up-regulated transcripts. Name gene and KEGG pathway in which gene is associated with, is indicated. NA= Not associated KEGG pathway.

See Supplementary File 1

**Supplementary Table 10: First connectios of *PCNA*.** Table shows the first connections of the *PCNA* gene within the network of up-regulated transcripts. Name gene and KEGG pathway in which gene is associated with, is indicated. NA= Not associated KEGG pathway.

See Supplementary File 1

**Supplementary Table 11: First connections of the *PIK3C3*.** Table shows the first connections of the *PIK3C3* gene within the network of up-regulated transcripts. Name gene and KEGG pathway in which gene is associated with, is indicated. NA= Not associated KEGG pathway.

See Supplementary File 1

**Supplementary Table 12: First connections of the *PRKAA1*.** Table shows the first connections of the *PRKAA1* gene within the network of up-regulated transcripts. Name gene and KEGG pathway in which gene is associated with, is indicated. NA= Not associated KEGG pathway.

See Supplementary File 1

**Supplementary Table 13: First connections of the SNX2**

---

| GEN   | KEGG                   |
|-------|------------------------|
| FNBP1 | NA                     |
| SNX4  | Endocytosis (hsa04144) |
| SNX6  | Endocytosis (hsa04144) |

---

Table shows the first connections of the *SNX2* gene within the network of up-regulated transcripts. Name gene and KEGG pathway in which gene is associated with, is indicated. NA= Not associated KEGG pathway.

**Supplementary Table 14: First connections of the *RPAL*.** Table shows the first connections of the *RPAL* gene within the network of up-regulated transcripts. Name gene and KEGG pathway in which gene is associated with, is indicated. NA= Not associated KEGG pathway.

See Supplementary File 1

**Supplementary Table 15: First connections of the *GABARPALI*.** Table shows the first connections of the *GABARPALI* gene within the network of down-regulated transcripts. Name gene and KEGG pathway in which gene is associated with, is indicated. NA= Not associated KEGG pathway.

See Supplementary File 1

**Supplementary Table 16: First connection of *CLN3*.** Table shows the first connections of the *CLN3* gene within the network of down-regulated transcripts. Name gene and KEGG pathway in which gene is associated with, is indicated. NA= Not associated KEGG pathway.

See Supplementary File 1

**Supplementary Table 17: First connections of the *GABARAPL2*.** Table shows the first connections of the *GABARAPL2* gene within the network of up-regulated transcripts. Name gene and KEGG pathway in which gene is associated with, is indicated. NA= Not associated KEGG pathway.

See Supplementary File 1

**Supplementary Table 18: First connections of the *MAP1LC3A*.** Table shows the first connections of the *MAP1LC3A* gene within the network of down-regulated transcripts. Name gene and KEGG pathway in which gene is associated with, is indicated. NA= Not associated KEGG pathway.

See Supplementary File 1

**Supplementary Table 19: First connections of the *MAPL1C3B*.** Table shows the first connections of the *MAPL1C3B* gene within the network of down-regulated transcripts. Name gene and KEGG pathway in which gene is associated with, is indicated. NA= Not associated KEGG pathway.

See Supplementary File 1

**Supplementary Table 20: First connections of the *PABPC1*.** Table shows the first connections of the *PABPC1* gene within the network of down-regulated transcripts. Name gene and KEGG pathway in which gene is associated with, is indicated. NA= Not associated KEGG pathway.

See Supplementary File 1

**Supplementary Table 21: First connections of the *SMAD3*.** Table shows the first connections of the *SMAD3* gene within the network of down-regulated transcripts. Name gene and KEGG pathway in which gene is associated with, is indicated. NA= Not associated KEGG pathway.

See Supplementary File 1

**Supplementary Table 22: First connections of the *SQSTM1*.** Table shows the first connections of the *SQSTM1* gene within the network of down-regulated transcripts. Name gene and KEGG pathway in which gene is associated with, is indicated. NA= Not associated KEGG pathway.

See Supplementary File 1

**Supplementary Table 23: First connections of the *TRAF2*.** Table shows the first connections of the *TRAF2* gene within the network of down-regulated transcripts. Name gene and KEGG pathway in which gene is associated with, is indicated. NA= Not associated KEGG pathway.

See Supplementary File 1

**Supplementary Table 24: First connections of the *WIPI2*.** Table shows the first connections of the *WIPI2* gene within the network of down-regulated transcripts. Name gene and KEGG pathway in which gene is associated with, is indicated. NA= Not associated KEGG pathway.

See Supplementary File 1

**Supplementary Table 25: First connections of the *YWHAG*.** Table shows the first connections of the *YWHAG* gene within the network of down-regulated transcripts. Name gene and KEGG pathway in which gene is associated with, is indicated. NA= Not associated KEGG pathway.

See Supplementary File 1

**Supplementary Table 26: List of differentially expressed genes in healthy skin from Red hair color individuals vs Black hair color individuals.** Table contains Log2 Fold Change (logFc), P-Value and adjusted P-value ( adj.P-Val) for each gene.

See Supplementary File 2
